# Supplementary material
Source: PubMed Central journal article supplement (PMC5626008)
Supplement: NIHMS868226-supplement-Supplemental.pdf [file NIHMS868226-supplement-Supplemental.pdf]

## Supplementary Online Content

Moheimani RS, Bhetraratana M, Yin F, et al. Increased cardiac sympathetic activity and oxidative stress in habitual electronic cigarette users: implications for cardiovascular risk. *JAMA Cardiol*. Published online February 1, 2017. doi:10.1001/jamacardio.2016.5303

**eMETHODS:** Paraoxonase-1 (PON-1) Enzymatic Activity

**eTable 1:** Baseline Characteristics (Includes 5 E-cigarette Users With Detectable Nicotine)

**eTable 2:** E-Cigarette Use in All E-cigarette Users Without Detectable Nicotine

**eTable 3:** Heart Rate Variability (Includes 5 E-cigarette Users With Detectable Nicotine) (Normalized Units)

**eTable 4:** Heart Rate Variability (Includes 5 E-cigarette Users With Detectable Nicotine) (Absolute Units)

**eTable 5:** Blood Tests (Includes 5 E-cigarette Users With Detectable Nicotine)

**eFigure 1:** Cotinine Levels in E-cigarette Users Without Detectable Nicotine

This supplementary material has been provided by the authors to give readers additional information about their work.

## **eMETHODS-SUPPLEMENT**

Paraoxonase-1 (PON-1) enzymatic activity:

The enzymatic activity of human plasma PON-1 was determined by its capacity to hydrolyze paraoxon substrate to p-nitrophenol. Assays were performed in duplicate in clear, flat-bottom, 96-well plates (Corning® Costar®), and measurements were conducted using the BioTek Synergy Mx microplate reader and Gen5 software. From each plasma sample, 5  $\mu$ L was incubated with paraoxon (Chem Service Inc., catalog # N-12816-100MG) in the assay buffer (0.1 M Tris-HCl buffer at pH 8.5, with 2 M NaCl and 2 mM CaCl<sub>2</sub>) at room temperature. The kinetics of p-nitrophenol formation were immediately measured every 15 seconds at 405 nm for a total of four minutes in the BioTek microplate reader. The absorbance readings (OD/min) were converted into nanomoles p-nitrophenol/min/ml with the use of the molar extinction coefficient for p-nitrophenol, determined to be 16,734 M<sup>-1</sup>cm<sup>-1</sup> at a pH of 9.18, and considering a path length of 0.58 cm.

**eTABLE 1-SUPPLEMENT**  
**Baseline Characteristics (Includes 5 e-cigarette users with detectable nicotine)**

|                                                                                                                                                             | <b>E-Cigarette User</b> | <b>Non-User Control</b> | <b>p value</b> |
|-------------------------------------------------------------------------------------------------------------------------------------------------------------|-------------------------|-------------------------|----------------|
|                                                                                                                                                             | (n=21)                  | (n=18)                  |                |
| Age (years)                                                                                                                                                 | 28.7 ± 1.1              | 26.6 ± 1.5              | 0.25           |
| Sex (M/F)                                                                                                                                                   | 15/6                    | 7/11                    | 0.05           |
| BMI (kg/m <sup>2</sup> )                                                                                                                                    | 25.3 ± 0.7              | 23.0 ± 0.9              | 0.04           |
| Ethnicity                                                                                                                                                   |                         |                         |                |
| African American                                                                                                                                            | 1                       | 2                       |                |
| Asian                                                                                                                                                       | 3                       | 3                       |                |
| Hispanic                                                                                                                                                    | 2                       | 2                       |                |
| White (Non-Hispanic)                                                                                                                                        | 15                      | 11                      |                |
| Former smoker                                                                                                                                               | 15                      | 2                       |                |
| Pack-years                                                                                                                                                  | 2.3 ± 0.5               | 0.6 ± 0.4               |                |
| Interval since quitting (years)                                                                                                                             | 2.3 ± 0.6               | 13 ± 7                  |                |
| E-cigarette use                                                                                                                                             |                         |                         |                |
| Minutes/day                                                                                                                                                 | 247 ± 284 (5-960)       |                         |                |
| Duration (years)                                                                                                                                            | 1.8 ± 0.6 (1-3)         |                         |                |
| SBP (mmHg)                                                                                                                                                  | 116.4 ± 2.2             | 109.0 ± 2.6             | 0.07           |
| DBP (mmHg)                                                                                                                                                  | 74.6 ± 2.3              | 70.0 ± 2.0              | 0.11           |
| MAP (mmHg)                                                                                                                                                  | 88.5 ± 2.0              | 83.0 ± 2.0              | 0.07           |
| HR (bpm)                                                                                                                                                    | 65.9 ± 2.3              | 63.0 ± 2.0              | 0.35           |
| BMI = body mass index, bpm = beats per minute, DBP = diastolic blood pressure, HR = heart rate, MAP = mean arterial pressure, SBP = systolic blood pressure |                         |                         |                |

**eTable 2-SUPPLEMENT**

**E-Cigarette Use**

| User | Device*<br>Liquid/day (ml) | Flavor                         | Nicotine(mg) <sup>F</sup> |         |
|------|----------------------------|--------------------------------|---------------------------|---------|
| 1    | Pen                        | Strawberry cheesecake, Unicorn | 6                         | Unknown |
| 2    | Mod                        | Milk                           | 3                         | 15+     |
| 3    | Cigalike, Pen              | Blu, Cherry                    | 2.4%, 3                   |         |
|      | Unknown                    |                                |                           |         |
| 4    | Pen                        | Fruit                          | 6                         | 2       |
| 5    | Cigalike                   | Mint                           | 18                        |         |
|      | Unknown                    |                                |                           |         |
| 6    | Mod                        | Fruity                         | 6                         | 3       |
| 7    | Pen                        | Menthol                        | 12                        | 3       |
| 8    | Pen                        | Savory Flavors                 | 3                         | 3       |
| 9    | Pen                        | Custards and Creams            | 8                         | Unknown |
| 10   | Pen                        | Gogurt                         | 3                         | Unknown |
| 11   | Pen                        | Chase the Vapor                | 8                         | Unknown |
| 12   | Cigalike                   | Menthol                        | 12                        |         |
|      | Unknown                    |                                |                           |         |
| 13   | Unknown                    | Apple, Fruit                   | 1.2%                      | 5       |
| 14   | Unknown                    | Vaping Rabbit, Milkman         | 3                         | 2       |
| 15   | Mod                        | Vapor Chef, Honeydew           | 3                         | 4-7     |
| 16   | Mod                        | Fruity, Menthol                | 3                         | 6       |
| **17 | Pen                        | Vanilla                        | 6                         | 3-5     |
| **18 | Pen                        | Vapor nuvola, Guava banana     | 12                        | Unknown |
| **19 | Mod                        | Enigma, Blueberry, Strawberry  | 3                         | 22      |
| **20 | Pen                        | Vapism, White Girl             | 6                         | 15      |
| **21 | Cigalike                   | Menthol Ice                    | 2.4%                      | 8       |

\*E-cigarette devices are generally divided into 1<sup>st</sup> generation “Cigalike” devices, which come with a chamber preloaded with e-liquid; 2<sup>nd</sup> generation, “Pen” devices, in which the

user can mix and refill customized flavors; and 3<sup>rd</sup> generation, “Mods” in which the voltage of the heating element can be modified, providing a larger quantity of aerosol.

Units of nicotine content is mgs in the eLiquid used in the Pen and Mods, % in the Cigalike devices

\*\*17-21 were excluded from analysis since they had detectable nicotine levels consistent with recent e-cigarette use.

**eTable 3-SUPPLEMENT**

**Heart Rate Variability (Includes 5 e-cigarette users with detectable nicotine)**

**(normalized units)**

|             | <b>E-Cigarette User</b> | <b>Non-User Control</b> | <b><i>p</i> value</b> |
|-------------|-------------------------|-------------------------|-----------------------|
|             | (n=21)                  | (n=18)                  |                       |
| HF (nu)     | 48.2 ± 3.2              | 57.8 ± 3.5              | <0.05                 |
| LF (nu)     | 51.0 ± 3.4              | 39.9 ± 3.6              | 0.03                  |
| LF/HF ratio | 1.25 ± 0.16             | 0.85 ± 0.17             | 0.09                  |

HF = high frequency, LF = low frequency, nu=normalized units; Mean values are displayed since these data followed a parametric distribution.

**eTable 4-SUPPLEMENT****Heart Rate Variability (Includes 5 e-cigarette users with detectable nicotine)****(absolute units)**

|                                 | <b>E-Cigarette User</b><br>(n=21) | <b>Non-User Control</b><br>(n=18) | <b><i>p</i> value</b> |
|---------------------------------|-----------------------------------|-----------------------------------|-----------------------|
| HF ( $\mu\text{s}^2$ )          | 615.0 $\pm$ 259.8                 | 1376.5 $\pm$ 574.2                | 0.14                  |
| LF ( $\mu\text{s}^2$ )          | 483.0 $\pm$ 220.6                 | 1316.0 $\pm$ 504.0                | 0.09                  |
| VLF ( $\mu\text{s}^2$ )         | 942.5 $\pm$ 409.0                 | 987.1 $\pm$ 432.5                 | 0.66                  |
| Total power ( $\mu\text{s}^2$ ) | 1970.0 $\pm$ 601.8                | 4502.0 $\pm$ 1279.8               | 0.03                  |

HF = high frequency, LF = low frequency, VLF = very low frequency; Median values are displayed since these data followed a nonparametric distribution.

**eTable 5-SUPPLEMENT**

**Blood tests (Includes 5 e-cigarette users with detectable nicotine)**

|                             | <b>E-Cigarette User</b> | <b>Non-User Control</b> | <b><i>p</i> value</b> |
|-----------------------------|-------------------------|-------------------------|-----------------------|
|                             | (n=12)                  | (n=18)                  |                       |
| LDL-Ox (units)              | 3741.7 ± 351.6          | 2413.3 ± 310.1          |                       |
| 0.008                       |                         |                         |                       |
| PON-1                       | 612.3 ± 109.3           | 892.8 ± 110.0           | 0.08                  |
| (nmol p-nitrophenol/min/ml) |                         |                         |                       |
| HOI (units)                 | 0.49 ± 0.05             | 0.38 ± 0.04             | 0.09                  |
| Fibrinogen(mg/dL)           | 268.9 ± 9.7             | 251.4 ± 10.5            | 0.23                  |

HOI = HDL anti-oxidant index, LDL-Ox = LDL-Oxidizability, PON-1 = Paraoxonase-1 activity; Mean values are displayed since these data followed a parametric distribution.

eFigure 1.

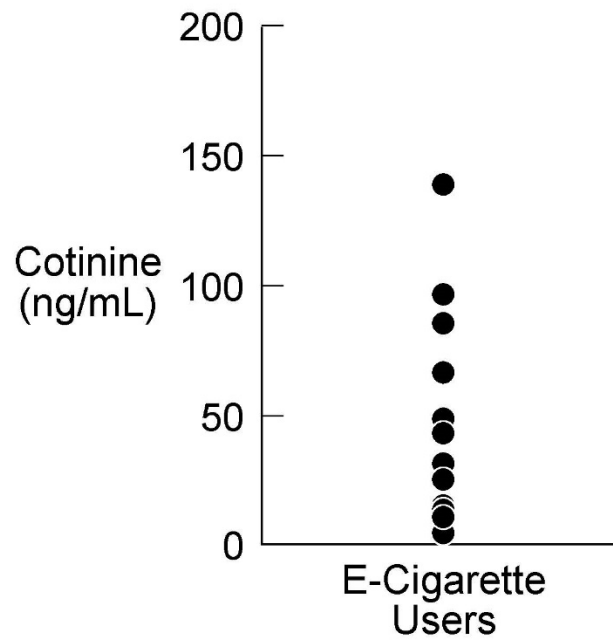

eFigure 1. Cotinine levels on the day of the study in e-cigarette users. Cotinine levels are well-distributed across the range of values from 3.8-139 ng/mL.
